# Supplementary material for: The exocyst complex regulates C. elegans germline stem cell proliferation by controlling membrane Notch levels
Source: Oxford University Press journal article supplement (doi:10.1242/dev.196345), 2021-08-01
Supplement: dev196345supp.pdf [file dev196345supp.pdf]

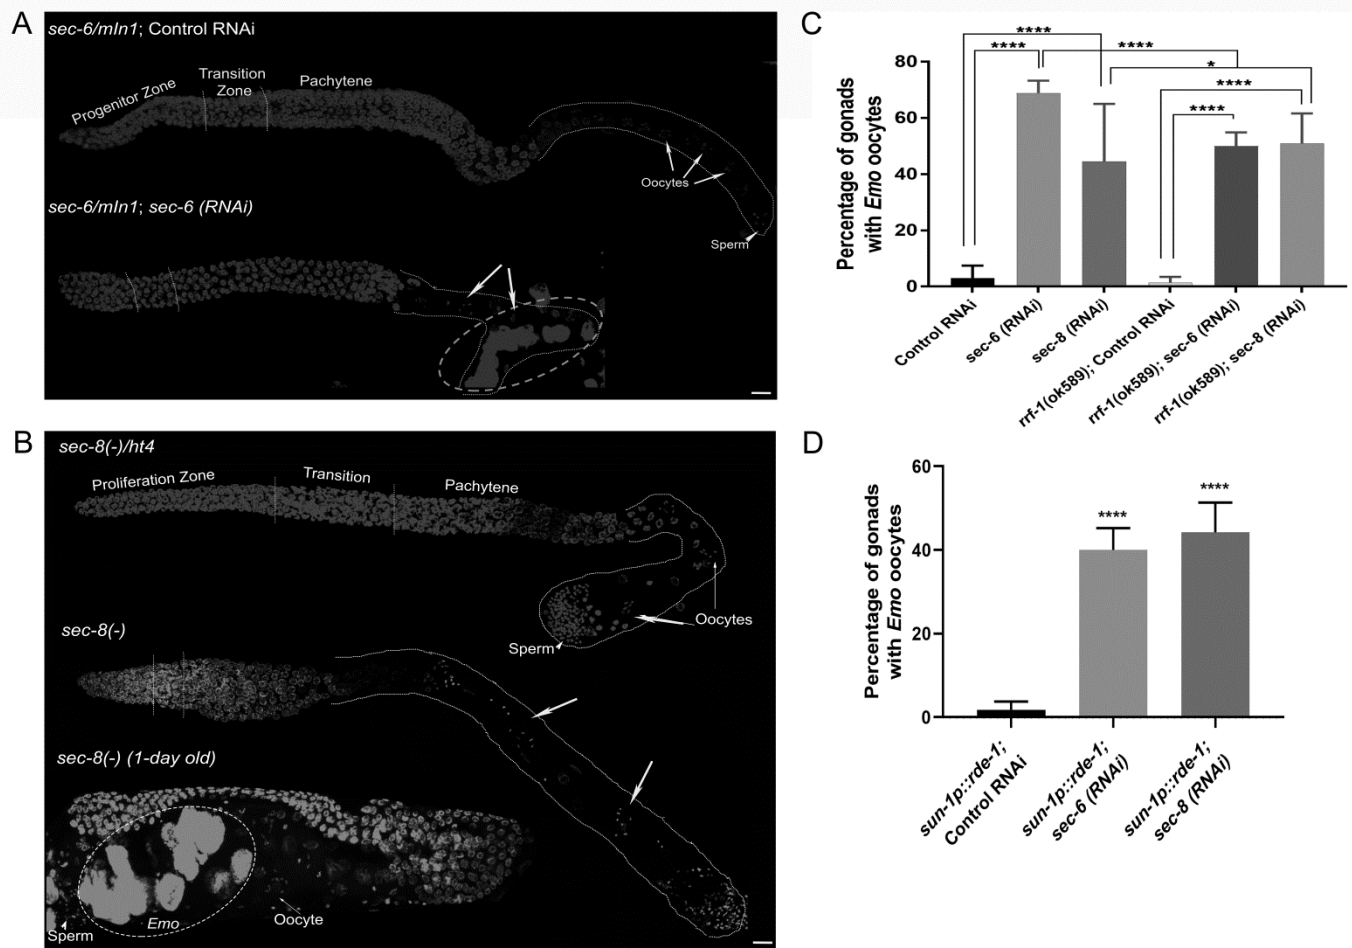

**Fig. S1. Genetic mutants of *sec-6* and *sec-8* phenocopy RNAi-induced germline development defects. (A)** Maximum projection fluorescence images of dissected and whole-mounted gonads from the indicated mutant adult genotypes, stained with DAPI (grey). **(B)** Maximum projection fluorescence images of dissected and whole mounted gonads from the indicated genotypes, stained with DAPI (grey) at young and 1-day old adult. Dashed oval marks endoreduplicating (*emo*) oocytes. For both panels: dotted vertical lines demarcate the transition zone (TZ) from the progenitor zone (PZ) and pachytene (meiotic zone); dotted trace curves outline the proximal gonadal boundary. **(C, D)** Fraction of gonads showing endoreduplicating (Emo) oocytes upon exocyst subunit RNAi in wild type ( $n > 80$  worms) and *rrf-1* mutant worms ( $n > 120$  worms) (D) and *sun-1p::rde-1* ( $n > 100$  worms). Arrows = oocytes, arrowhead = sperm. Scale bar = 20  $\mu$ m.

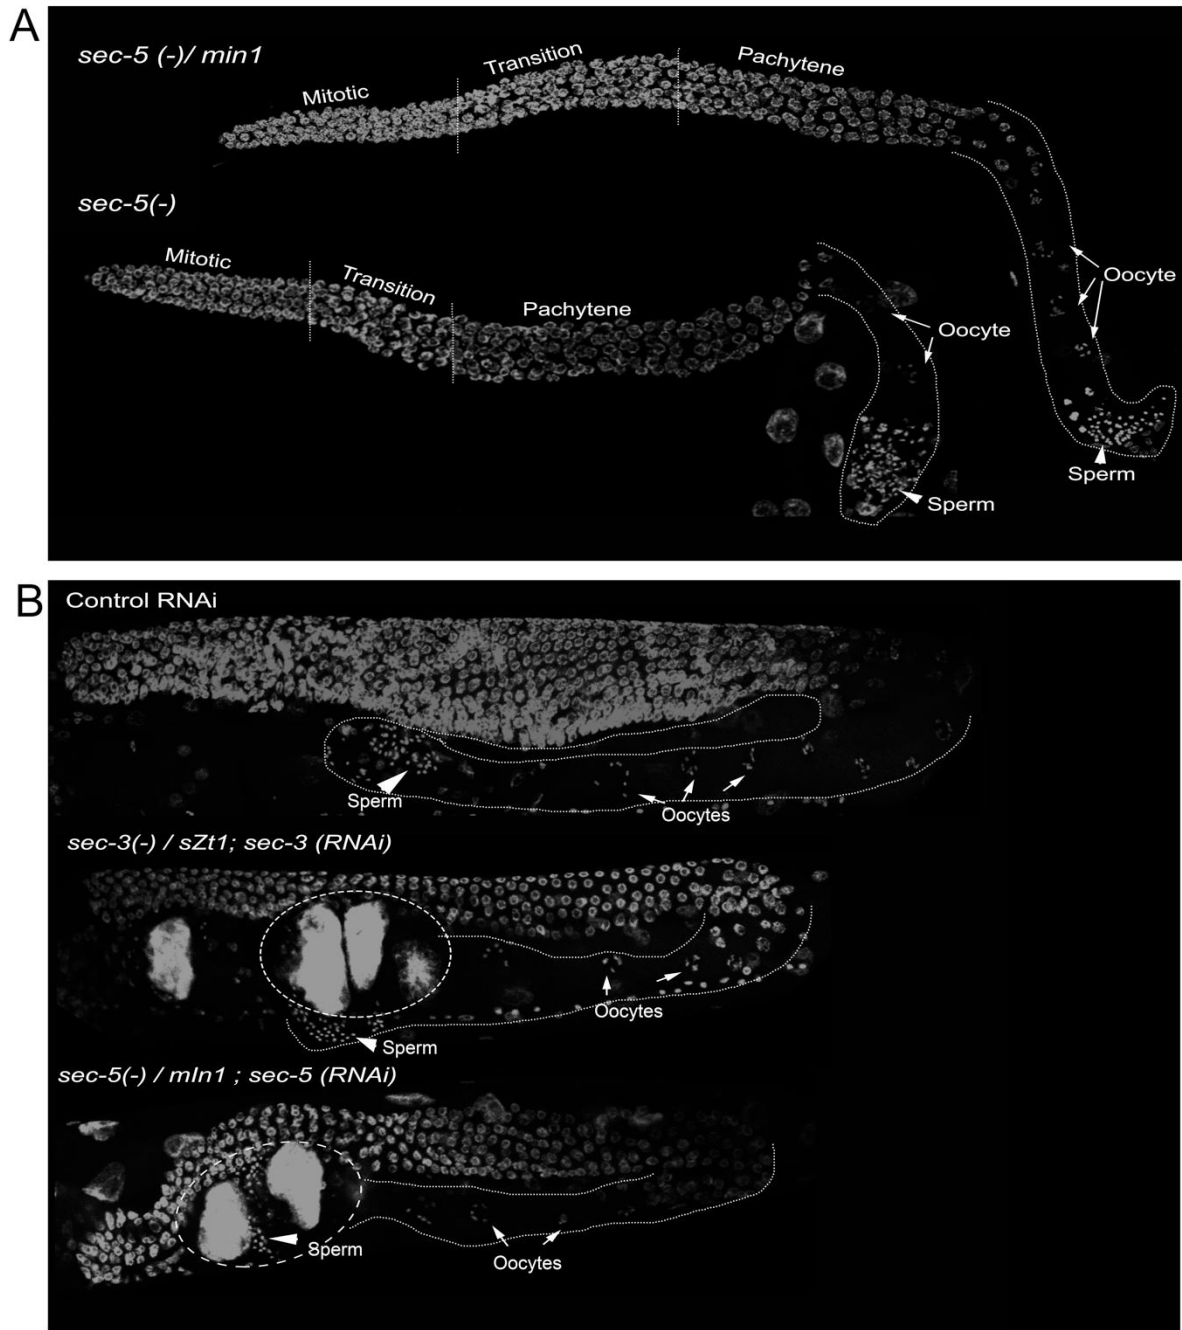

**Fig. S2. Exocyst complex components *sec-3* and *sec-5* are required for germline development in *C. elegans*.** **(A)** Maximum projection fluorescence images of dissected and whole-mounted gonads from the indicated mutant adult genotypes, stained with DAPI (grey). **(B)** Whole-mounted maximum projection images of hermaphrodite gonads stained with DAPI (grey) from the indicated genotypes. Dashed ovals mark endoreduplicating (*emo*) oocytes. For both panels: dotted vertical lines demarcate the transition zone from the progenitor zone (PZ) and pachytene (meiotic zone); dotted trace curves outline the proximal gonadal boundary. Arrows = oocytes, arrowheads = sperm. Scale bar = 20  $\mu$ m

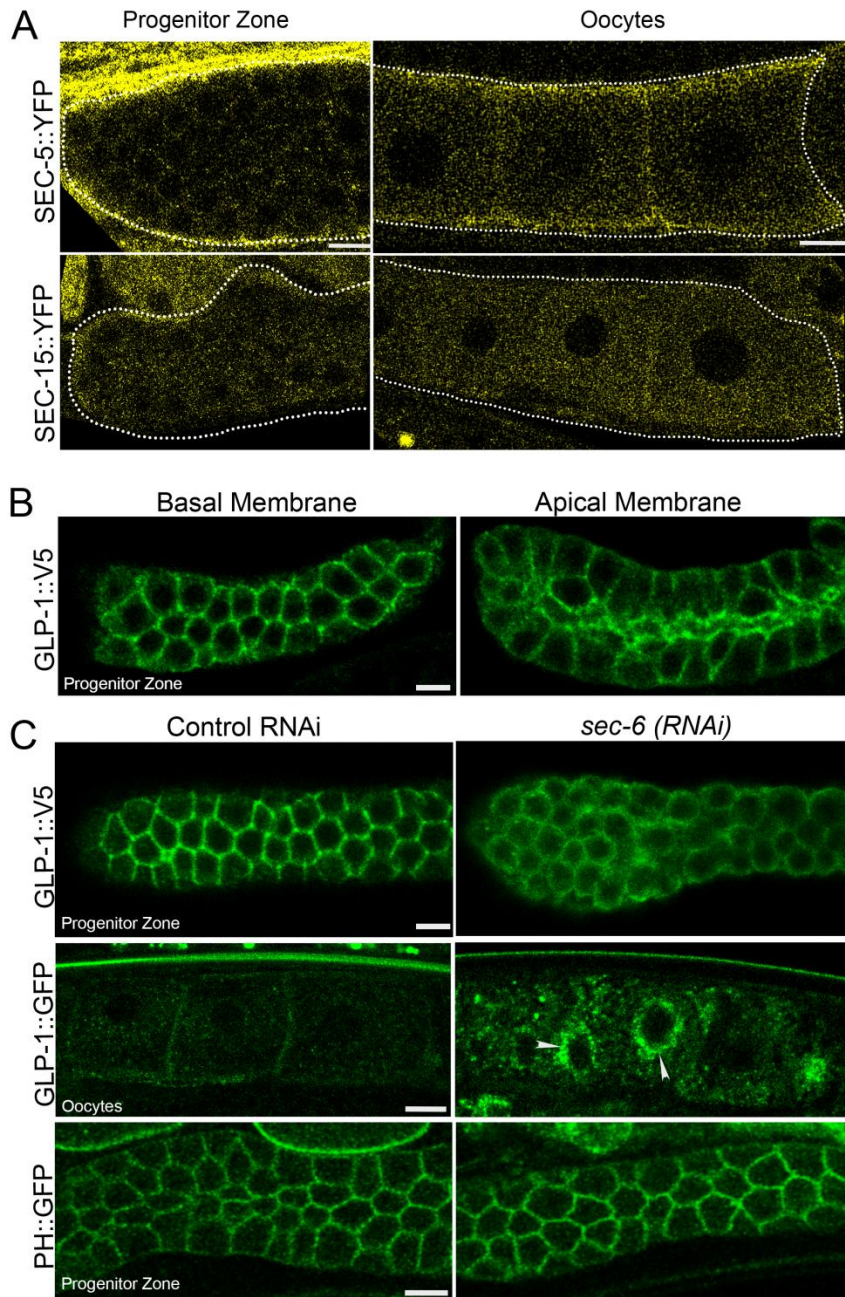

**Fig. S3. The Exocyst complex is expressed in the germline and is required for trafficking of GLP-1 in the germline.** (A) Representative confocal micrographs of the progenitor zone (PZ) and oocytes expressing SEC-5::YFP and SEC-15::YFP. (B) Representative immunofluorescence micrographs of dissected hermaphrodite gonads expressing the GLP-1::V5 transgene, stained with an anti-V5 antibody showing the outer and inner membranes (top panel) of the PZ and gonads subjected to RNAi as indicated (bottom panel). (C) Representative confocal fluorescence micrographs of GLP-1::V5 immunostaining on the outer membrane of GSCs (upper panel), GLP-1::GFP in oocytes (middle panel) and PH::GFP, a plasma membrane marker (bottom panel) in control and *sec-6 RNAi* Scale bar = 10  $\mu$ m

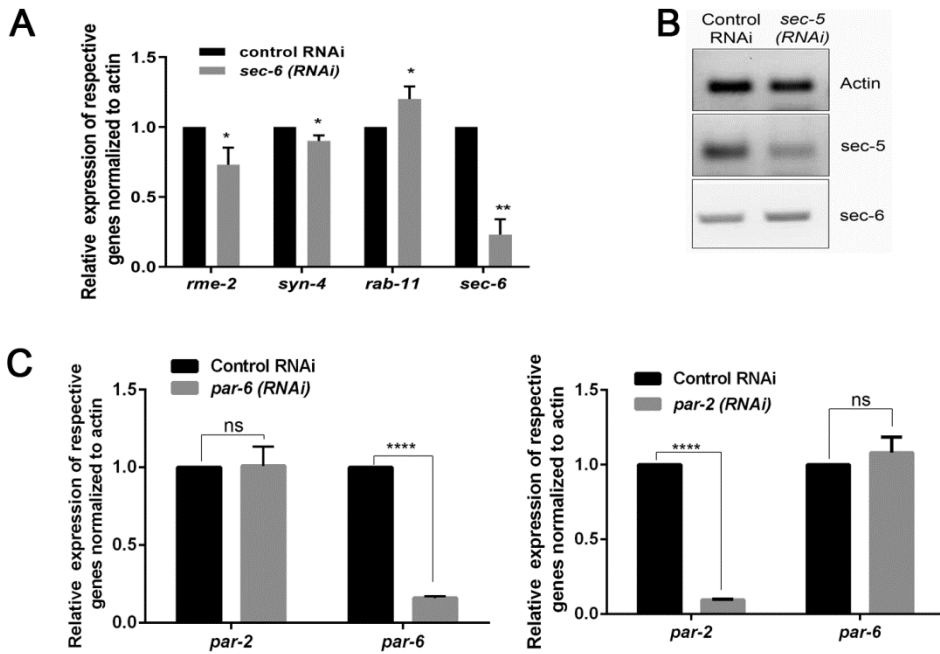

**Fig. S4. A. Quantitative RT-PCR analysis of the indicated genes in the respective RNAi backgrounds. A)** Relative gene expression of *rme-2*, *syn-4*, *rab-11* and *sec-6* upon control and *sec-6* RNAi. **B)** Agarose gels showing the specific reduction in levels of the indicated genes in control and *sec-5* (RNAi) using a semi-quantitative RT-PCR as compared to the  $\beta$ -actin control. **C)** Relative mRNA expression of *par-6* and *par-2* in the respective RNAi backgrounds, indicating the specificity of the RNAi.



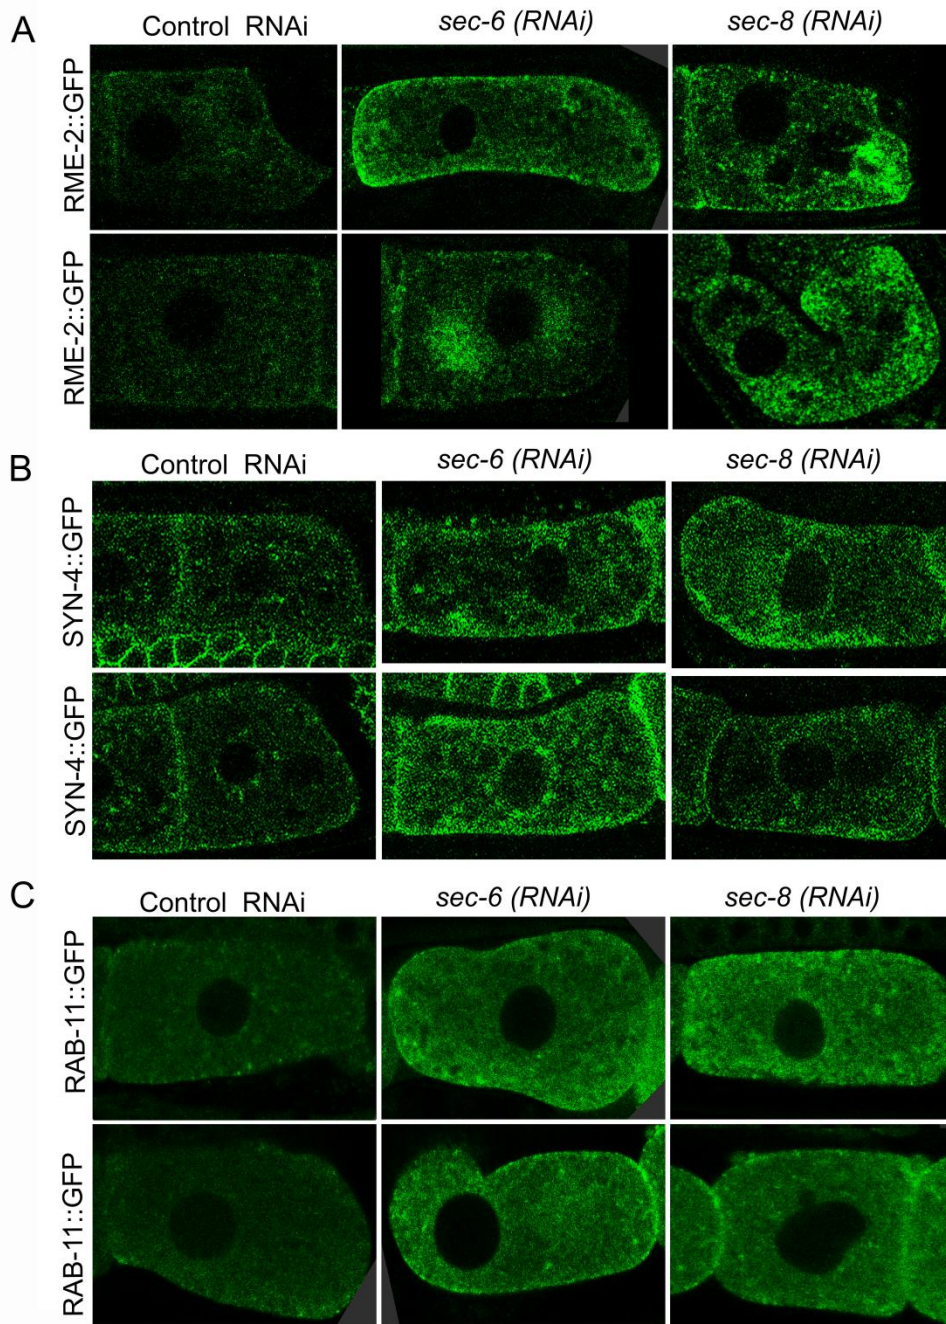

**Fig. S5. The Exocyst complex is required for vesicular trafficking in *C. elegans* oocytes:** Confocal fluorescence micrographs of mature oocytes expressing the indicated tagged protein RME-2::GFP (**A**), SYN-4::GFP (**B**) and RAB-11::GFP (**C**) upon control, *sec-6* or *sec-8* (RNAi).

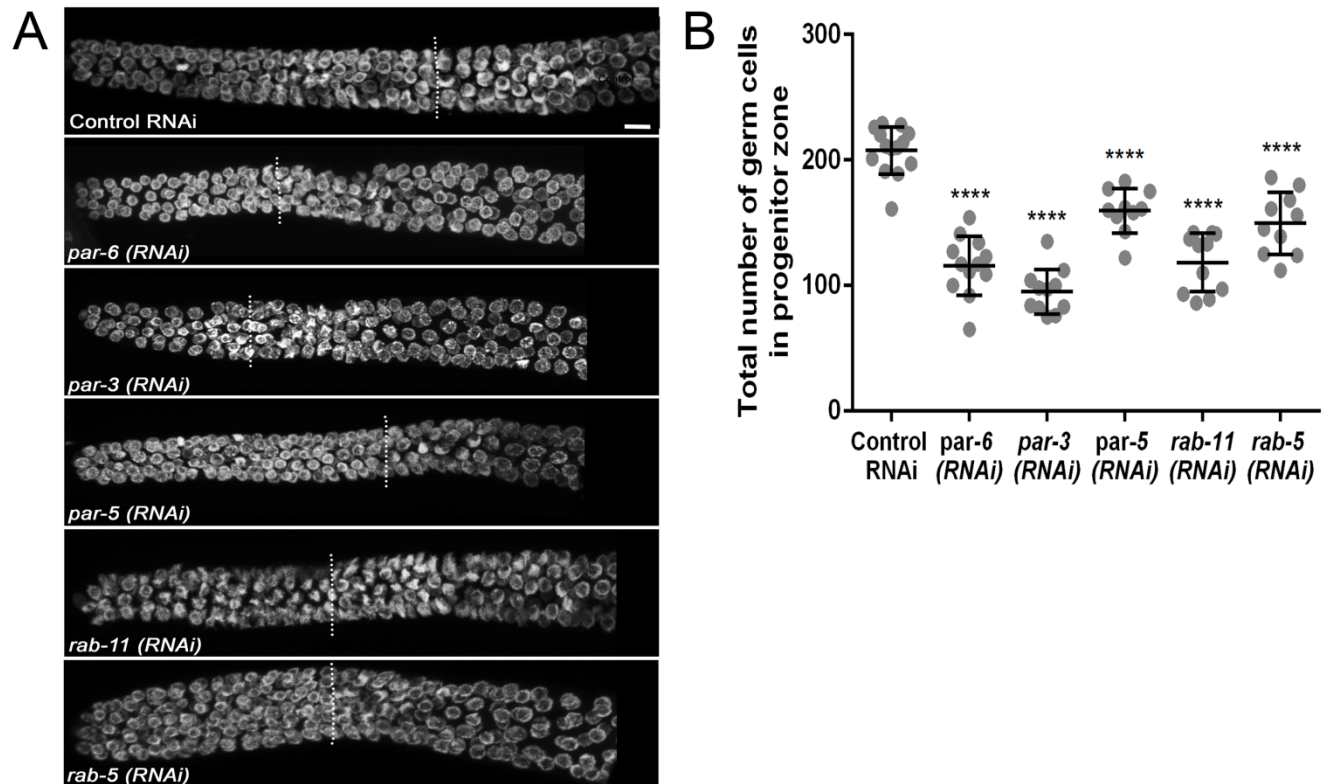

**Fig. S6. Germline stem cell proliferation is defective upon RNAi of aPars and Rab GTPases Rab-5 and Rab-11:** **A)** Representative confocal immunofluorescence micrographs of dissected hermaphrodite gonads from the indicated RNAi and stained with the DNA-binding dye (grey, DAPI). Dashed line demarcates the progenitor zone (PZ) from the transition zone (TZ). **B)** Total number of GSCs upon knockdown of the indicated genes. Scale bar = 10  $\mu$ m.

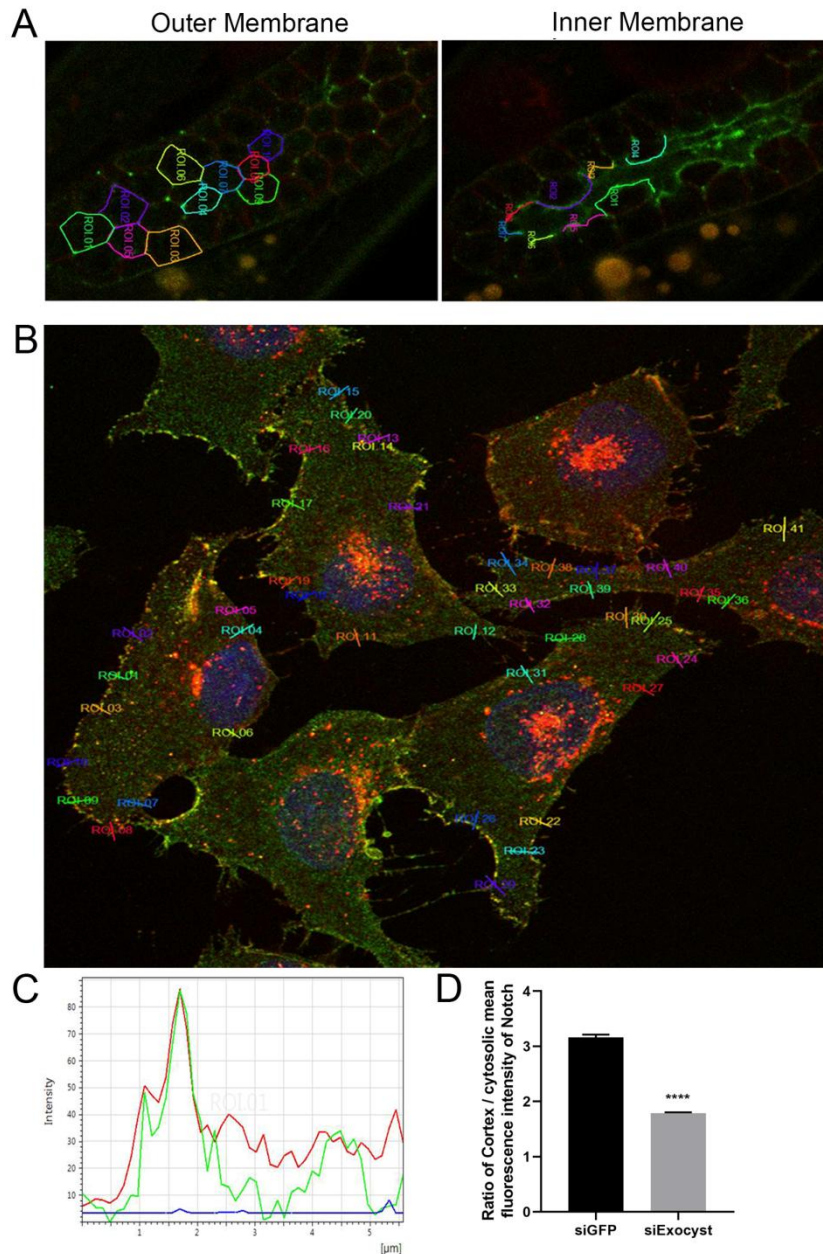

**Fig. S7. Pictorial representation of methodology for drawing line scans to quantify plasma membrane levels of Notch in *C. elegans* and mammalian cells. (A)** Representative micrographs of the progenitor zone (PZ) from animals expressing GLP-1::GFP (green) and PH::mCherry (red) showing the merged image (green + red). Linescans were drawn on images of a single confocal plane that corresponded to the top (for the outer surface) and middle (for the inner surface) focal plane of the gonad along the cell boundaries using red fluorescence (PH::mCherry, which decorates the plasma membrane) as a guide and the mean fluorescence intensity of the green channel (GLP-1::GFP) was calculated using LASX software analysis tool (see Materials and Methods). About 8-10 cells per gonad from 12-15 worms (one gonadal arm/worm) were used for these measurements. **(B)** Representative

max projection image of a field of mammalian cells (U2OS) co-stained with wheat-germ agglutinin (WGA – red) and human Notch2 (green). Linescans were drawn across the cell boundary from outside the cell to the cytoplasm using WGA (red) staining as the guide for the plasma membrane. Since the WGA staining was not uniform throughout, only the well-stained regions of the cell boundary were used to draw the linescans. Peak fluorescence intensity on the membrane in the green channel (for Notch2) was measured using the red channel (WGA) membrane peak as the guide. A minimum of 5 ROIs for each cell and about 40-50 ROIs per field were drawn. From a single field, only 5 cells were used for analysis to avoid over representation and uniform and unbiased data collection. **(C)** Graph shows the peak intensity at a given point on the line scan. We analyzed the peak intensity in the green channel corresponding to the plasma membrane falling within a 2 nm region of the red peak **(D)** Fraction of cortical and cytoplasmic Notch2 receptor (see Materials and Methods for details) upon control and exocyst complex siRNA treatment in U2OS cells.



**A**

| Yeast two-hybrid |           |            |
|------------------|-----------|------------|
| Serial Number    | Gene Name | PBS* score |
| 1                | SEC-5     | <b>A</b>   |
| 2                | PAR-5     | <b>C</b>   |
| 3                | KLC-1     | <b>C</b>   |
| 4                | PGL-3     | <b>D</b>   |
| 5                | UNC-15    | <b>A</b>   |

PBS score: Predicted Biological Score, a confidence score attributed to interactions as described in Formstecher et al., 2005.

A: Very high confidence

B: High confidence

C: Good interaction

D. Moderate interaction

E. Highly connected interaction, due to highly interactive or connected proteins or promiscuous domains

F. Technical artifacts

**B**

| Mass spectrometry |           |                    |            |
|-------------------|-----------|--------------------|------------|
| Serial Number     | Gene Name | Number of peptides | % Coverage |
| 1                 | SEC-3     | 7                  | 15.9       |
| 2                 | SEC-5     | 1                  | 3.7        |
| 3                 | SEC-8     | 4                  | 8.7        |
| 4                 | RAB-11    | 1                  | 16.5       |
| 5                 | PAR-5     | 12                 | 54.8       |
| 6                 | KLC-2     | 2                  | 9.6        |
| 7                 | PGL-1     | 4                  | 9.3        |
| 8                 | UNC-15    | 3                  | 6.3        |

**Fig. S8. PAR5 is identified as an interactor of exocyst subunit SEC6/ Exoc3 from *C. elegans* and human systems.** (A) Selected high confidence interactors of exocyst subunit SEC-6 from *C. elegans* obtained through a yeast two-hybrid screen. See Materials and Methods for details. (B) Selected high confidence interactors of exocyst subunit Sec-6 from whole worm lysates expressing SEC-6::GFP::SBP, obtained through affinity purification using SBP-tag followed by mass spectrometry. See Materials and Methods for details.

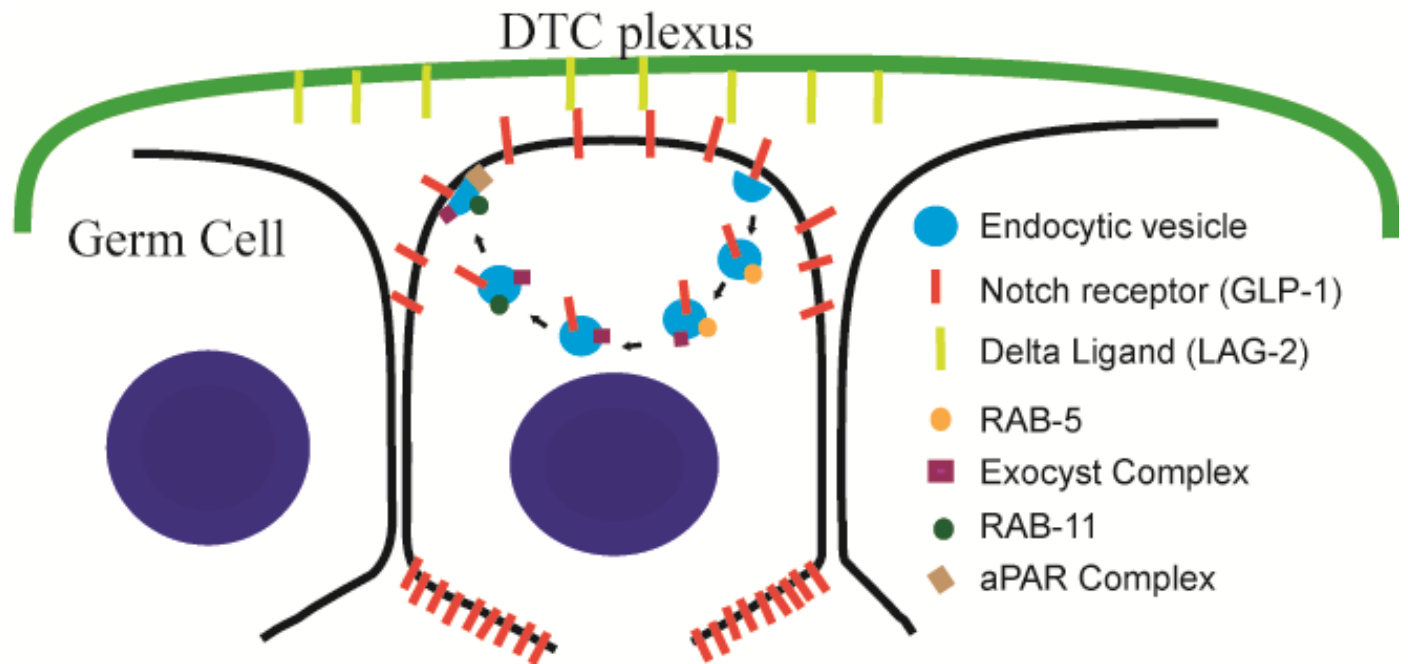

**Fig. S9.** Graphical model representing Notch/GLP-1 distribution in the GSCs in *C. elegans* and a possible mechanism of Notch trafficking and localization at the Niche-facing membrane of GSCs by Exocyst complex, Rab GTPases RAB-5, RAB-11 and aPar complex.

**Table S1. Description of strains used in this study**

| Strain Name | Description                                                                                                        | Source     |
|-------------|--------------------------------------------------------------------------------------------------------------------|------------|
| N2          | Bristol strain, Wild type                                                                                          | CGC        |
| OD95        | Itls37[(pAA64) pie-1p::mCherry::his-58 + unc-119(+)] IV; Itls38 [pie-1p::GFP::PH (PLC1delta1) + unc-119(+)]        | CGC        |
| OD70        | Itls44 [pie-1p::mCherry::PH(PLC1delta1) + unc-119(+)]                                                              | CGC        |
| OD58        | Itls38 [pie-1p::GFP::PH(PLC1delta1) + unc-119(+)]                                                                  | CGC        |
| RT368       | unc-119(ed3) III; pwls98 [ YP170::tdimer-2; unc-119 (+)]                                                           | CGC        |
| VC2648      | sec-8(ok2187) I/hT2 [bli-4(e937) let-?(q782) qls48] (I;III)                                                        | CGC        |
| tm4536      | sec-6(tm4536) /mln1 [mls14 dpy-10(e128)] II                                                                        | NBRP       |
| DV2689      | sec-5(pk2358)/ mln1 [dp-10(e128) mls14] II                                                                         | CGC        |
| VC2003      | +/szT1[lon-2(e678)] I; sec-3(ok2238)/szT1 X                                                                        | CGC        |
| FT1265      | sec-5(pk2358)II; xnls461 [sec-5::YFP+ unc-119(+)]                                                                  | CGC        |
| FT1379      | avr-14(ad1302) I; xnSi34 [sec-15::YFP+ Unc-119(+)] II; unc-119 (ed3) III; glc-1(pk54::Tc1) avr-15(ad1051) V        | CGC        |
| WH327       | ojls23 [pie-1p::GFP::C34B2.10]                                                                                     | CGC        |
| RB798       | rff-1(ok589) I.                                                                                                    | CGC        |
| WH351       | ojls37 [pie-1p::GFP::ugtp-1 + unc-119(+)]                                                                          | CGC        |
| WH347       | unc-119(ed3) III; ojls35 [ pie-1p::GFP::rab-11.1; unc-119 (+)]                                                     | CGC        |
| GC833       | glp-1(ar202) III                                                                                                   | CGC        |
| DG2389      | glp-1(bn18) III                                                                                                    | CGC        |
| MVS1        | sec-6 (SMYL04[sec-6::GFP::SBP] II                                                                                  | This study |
| MVS6        | sec-6 (SMYL04[sec-6::GFP::SBP] II; Itls44 [pie-1p::mCherry::PH (PLC1delta1) + unc-119(+)]                          | This study |
| MVS8        | EV343; Itls44 [pie-1p::mCherry::PH (PLC1delta1) + unc-119(+)]                                                      | This study |
| JK2868      | qls56 [lag-2p::GFP + unc-119(+)]                                                                                   | CGC        |
| JH2060      | axls1498 [pie-1p::GFP::gld-1 ORF::gld-1 3'utr + unc-119(+)]                                                        | CGC        |
| EV343       | efEx12 [glp-1::TY1::EGFP::3xFLAG(92C12) + unc-119(+)]                                                              | CGC        |
| RT408       | pwls116 [rme-2p::rme-2::GFP::rme-2 3'UTR + unc-119(+)].                                                            | CGC        |
| JK5933      | glp-1(q1000[glp-1::4xV5]) III.                                                                                     | Kimble Lab |
| JK5929      | lst-1(q1004[lst-1::4XV5]) I                                                                                        | CGC        |
| JK6002      | sygl-1(q1004[sygl-1::4XV5]) I                                                                                      | CGC        |
| MVS 10      | sec-6 (SMYL04[sec-6::GFP::SBP] II; efEx12 [glp-1::TY1::EGFP::3xFLAG(92C12) + unc-119(+)]                           | This study |
| MVS 11      | sec-6 (SMYL05[sec-6::degron::GFP::SBP] II                                                                          | This study |
| CA1199      | ieSi38 [sun-1p::TIR1::mRuby::sun-1 3'UTR + Cbr-unc-119(+)] IV.                                                     | CGC        |
| MVS12       | sec-6 (SMYL05[sec-6::degron::GFP::SBP] II; CA1199 (ieSi38 [sun-1p::TIR1::mRuby::sun-1 3'UTR + Cbr-unc-119(+)] IV.) | This study |
| DCL569      | mkcSi13 [sun-1p::rde-1::sun-1 3'UTR + unc-119(+)] II.                                                              | CGC        |
| JK2879      | gld-2(q497) gld-1(q485)/hT2 [bli-4(e937) let-?(q782) qls48] (I;III)                                                | CGC        |
| JK3182      | gld-3(q730) nos-3(q650)/mln1 [mls14 dpy-10(e128)] II                                                               | CGC        |

**Table S2. Description of oligos used in this study**

| Oligo name | Sequence                          | Purpose                                     |
|------------|-----------------------------------|---------------------------------------------|
| PK1        | TCTAAGCTTTAGCAGTCACAATCGAGCAC     | Forward to clone sec-3 in RNAi vector       |
| PK2        | TCTAAGCTTCGAGAGATTGCAATTGCTCC     | Reverse to clone sec-3 in RNAi vector       |
| PK3        | TCTAAGCTTACTACCTCCTACGGTAACAG     | Forward to clone sec-5 in RNAi vector       |
| PK4        | TCTAAGCTTGCGTCTGCATGATTCTCTAG     | Reverse to clone sec-5 in RNAi vector       |
| PK5        | TCTAAGCTTTGGACGTTGATGTGGAAGAG     | Forward to clone sec-6 in RNAi vector       |
| PK6        | TCTAAGCTTGAACCTTCGCCAGCAATTTCG    | Reverse to clone sec-6 in RNAi vector       |
| PK7        | TCTCCCGGGCTAGAAGGCATCGACCATTG     | Forward to clone sec-8 in RNAi vector       |
| PK8        | TCTCCCGGGTCCACTCGTGATAATCGTCC     | Reverse to clone sec-8 in RNAi vector       |
| MVS136     | TCCGAGAATCTTCTAATTGAAAT           | Forward to detect rrf-1(ok589) deletion     |
| MVS138     | TCAAGGGATTCAATTTCGTC              | Reverse to detect rrf-1(ok589) deletion     |
| PK17       | GTGGAACAAATGCCGATGAG              | Forward to detect sec-6(tm4536) deletion    |
| PK38       | TCTGAGGGATCCATGGACGTTGATGTGGAAGAG | Forward to detect sec-6(tm4536) deletion    |
| MVS395     | AACTTCAAATTAGACACAACATTGAAGAT     | Forward to detect SEC-6::GFP Crisper-edit   |
| MVS396     | AGTCAGCTTTGAACATGTTGGC            | Reverse to detect SEC-6::GFP Crisper-edit   |
| MVS393     | CAGACACAGATGTTCCGTTG              | Fwd in Sec-5(pk2358) ahead of mutation      |
| MVS392     | GAGAAAAGTCTCTGGGATATGT            | Fwd to detect Sec-5(pk2358) mutant          |
| MVS394     | GAAGAGCTTTGGGAACCAG               | Reverse to detect mutation in sec-5(pk2358) |
| MVS389     | GTAAGGAACTGCAAGCAG                | Forward to detect Sec-8 deletion            |
| MVS390     | GCAGGAGAAGACAAGAATCAGC            | Fwd to detect Sec-8 deletion                |
| MVS499     | AAGCTGGTGTGCGGTGTATG              | Forward for rme-2 RT-PCR                    |
| MVS500     | ATGACTCCAGCGAATGGTGC              | Reverse for rme-2 RT-PCR                    |
| MVS508     | CTCTCGTGACGATGAATACGAC            | Forward for rab-11.1 RT-PCR                 |
| MVS509     | CACTGTCTTGCCCTTCTACCG             | Reverse for rab-11.1 RT-PCR                 |
| MVS510     | CGCAGATCGACACGCAATTT              | Forward for syn-4 RT-PCR                    |
| MVS511     | ATGCCACGTGCTTGAGCTAT              | Reverse for syn-4 RT-PCR                    |
| MVS512     | CGGAGAGGAGCAAGTATCAAGAG           | Forward for Sec-6 RT-PCR                    |
| MVS513     | TACGTCGTCCTGATGCGAGT              | Reverse for Sec-6 RT-PCR                    |
| MVS514     | CGTTTTGGAGATCCGCTCAG              | Forward for Sec-8 RT-PCR                    |
| MVS515     | TCTGCTTGCAATTCCAGTA               | Reverse for Sec-8 RT-PCR                    |
| MVS516     | CGATTCGTGATGTGTGTGCT              | Forward for Par-2 RT-PCR                    |
| MVS517     | GGTGATGACGTGGGAGTTTG              | Reverse for Par-2 RT-PCR                    |
| MVS518     | TTCTCGGAAAGACGCTGGAT              | Forward for Par-6 RT-PCR                    |
| MVS519     | GCTGAATCCACCTGTAGCG               | Reverse for Par-6 RT-PCR                    |
| MVS520     | CCGCTCTTGCCCCATCAACCATG           | Forward for actin RT-PCR                    |
| MVS521     | CGGACTCGTCGTATTCTTGCT             | Reverse for actin RT-PCR                    |
| MVS534     | GGCTCTCTCAACGTATGCCA              | Forward for Sec-5 RT-PCR                    |
| MVS535     | TCGCATAGTGGTTTCGCATGT             | Reverse for Sec-5 RT-PCR                    |
| MVS522     | GGCTGTGGCCGAAGTGAT                | Forward for hExoc3 RT-PCR                   |
| MVS523     | CTGGATACTTGGCGTCCCC               | Reverse for hExoc3 RT-PCR                   |
| MVS526     | CGAGGTGGAGAAGGAGAGTG              | Forward for Hey1 RT-PCR                     |
| MVS527     | CTGGGTACCAGCCTTCTCAG              | Reverse for Hey1 RT-PCR                     |
| MVS530     | AACTGTTGGTGGCCTGAATC              | Forward for Herp2 RT-PCR                    |
| MVS531     | GCTGGTAAATGCAGGCGTAT              | Reverse for Herp2 RT-PCR                    |

**Table S3**

[Click here to download Table S3](#)
